# Supplementary material for: Adhesion of Plasmodium falciparum infected erythrocytes in ex vivo perfused placental tissue: a novel model of placental malaria
Source: Springer Nature journal article supplement (doi:10.1186/s12936-016-1342-2), 2016-05-26
Supplement: MOESM1 [file 10206160]

# **Adhesion of *Plasmodium falciparum* infected erythrocytes in ex vivo perfused placental tissue – a novel model of placental malaria**

Caroline Pehrson<sup>1\*§</sup>, Line Mathiesen<sup>2§</sup>, Kristine K Heno<sup>1</sup>, Ali Salanti<sup>1</sup>, Mafalda Resende<sup>1</sup>, Ron Dzikowski<sup>3</sup>, Peter Damm<sup>4</sup>, Stefan R Hansson<sup>5</sup>, Christopher L King<sup>6</sup>, Henning Schneider<sup>7</sup>, Christian W Wang<sup>1</sup>, Thomas Lavstsen<sup>1</sup>, Thor G Theander<sup>1</sup>, Lisbeth E Knudsen<sup>2</sup>, Morten A Nielsen<sup>1\*</sup>

<sup>1</sup>Centre for Medical Parasitology at Department of Immunology and Microbiology, Faculty of Health and Medical Sciences, University of Copenhagen and at Department of Infectious Diseases, Copenhagen University Hospital (Rigshospitalet), Denmark

<sup>2</sup>Section of Environmental Health, Department of Public Health, University of Copenhagen, Øster Farimagsgade 5A, 1353 Copenhagen, Denmark, Denmark

<sup>3</sup>Department of Microbiology and Molecular Genetics, The Institute for Medical Research Israel - Canada, The Kuvim Center for the Study of Infectious and Tropical Diseases, The Hebrew University-Hadassah Medical School, Jerusalem 91120, Israel

<sup>4</sup>Department of Obstetrics, Rigshospitalet, Faculty of Health and Medical Sciences, University of Copenhagen, Blegdamsvej 9, 2100 Copenhagen Ø, Denmark.

<sup>5</sup>Division of Obstetrics and Gynecology, Department of Clinical Sciences Lund, Lund University, Sweden.

<sup>6</sup>Center for Global Health and Diseases, Case Western Reserve University and Veterans Affairs Medical Center, Cleveland, USA

<sup>7</sup>Department of Obstetrics and Gynecology, Inselspital, Bern University Hospital, University of Bern, Switzerland

<sup>§</sup>These authors contributed equally to this work

\*Corresponding authors

Caroline Pehrson +45-35332909, [cpeh@sund.ku.dk](mailto:cpeh@sund.ku.dk)

Morten A Nielsen +45-35326803, [mortenn@sund.ku.dk](mailto:mortenn@sund.ku.dk)

**Additional file 1 - Quality and viability characteristics of perfusion experiments.**

| Experiment                                               | P211013   | P141113   | P091213    | P171013   | P211013-2 | P241013   | P100314 <sup>a</sup> | P170314 <sup>a</sup> | P200314 <sup>a</sup> | P041113   |
|----------------------------------------------------------|-----------|-----------|------------|-----------|-----------|-----------|----------------------|----------------------|----------------------|-----------|
| Maternal age (years)                                     | 40        | 41        | 32         | 31        |           |           | 28                   | 50                   | 27                   | 34        |
| Primipara                                                | No        | Yes       | Yes        | No        |           |           | No                   | No                   | Yes                  | No        |
| Newborn gender                                           | F         | M         | F          | F         | F         | M         | M                    | F                    | M                    | F         |
| Gestational age (weeks+days)                             | 38+0      | 39+2      | 38+2       | 38+4      | 38+1      | 39+2      | 38+2                 | 39+0                 | 39+1                 | 39+0      |
| Newborn weight (g)                                       | 3420      | 3712      | 2900       | 3166      | 3132      | 3944      | 3056                 | 2872                 | 3780                 | 3670      |
| Placenta weight (g)                                      | 706       | 649       | 691        | 818       |           | 797       | 546                  | 695                  | 607                  | 662       |
| Perfused cotyledon weight (g)                            |           |           |            |           |           |           | 19.2                 | 25.3                 | 36.9                 |           |
| Time from delivery to cannulation of fetal vessels (min) | 35        | 30        | 27         | 12        |           | 36        | 31                   | 34                   | 18                   | 40        |
| Volume change fetal circulation (ml/h)                   | 1.7       | -1.1      | -1.6       | 1.2       | -3.0      | -2.2      | -1.0                 | -7.7                 | -1.4                 | -4.7      |
| Volume change maternal circulation (ml/h)                | -1.3      | -1.8      | -2.0       | 2.2       | -1.3      | -0.3      | 2.2                  | 3.5                  | -3.7                 | 2.5       |
| Flow rate fetal circulation (ml/minute)                  | 3.2       | 3.0       | 2.8        | 3.5       | 3.6       | 2.9       | 2.7                  | 3.0                  | 2.7                  | 2.8       |
| pH maternal <sup>b</sup>                                 | 7.32±0.08 | 7.35±0.02 | 7.25±0.05  | 7.33±0.12 | 7.33±0.08 | 7.39±0.08 | 7.33±0.06            | 7.45±0.05            | 7.37±0.07            | 7.41±0.03 |
| pH fetal <sup>b</sup>                                    | 7.31±0.08 | 7.41±0.02 | 7.35±0.09  | 7.35±0.11 | 7.36±0.06 | 7.34±0.03 | 7.24±0.06            | 7.38±0.03            | 7.40±0.02            | 7.45±0.01 |
| pO <sub>2</sub> maternal (kPa) <sup>b</sup>              | 17.7±1.0  | 14.0±2.5  | 14.1±4.6   | 14.8±1.5  | 14.9±3.2  | 9.5±2.8   | 19.8±0.8             | 21.1±0.8             |                      | 14.2±2.3  |
| pO <sub>2</sub> fetal inflow (kPa) <sup>b</sup>          | 5.8±5.2   | 9.7±4.5   | 4.6±2.8    | 3.4±2.4   | 4.4±3.1   | 6.0±5.7   | 3.7±1.8              | 7.6±1.7              |                      | 7.0±4.2   |
| pO <sub>2</sub> fetal outflow (kPa) <sup>b</sup>         | 8.0±1.8   | 8.0±2.5   | 8.8±4.0    | 5.8±1.4   | 6.1±1.1   | 6.8±1.8   | 9.2±2.5              | 6.8±2.5              |                      | 9.1±2.3   |
| Glucose uptake maternal (μmol/L/min) <sup>c</sup>        | 39.5±10.1 |           | 45.4±11.2  | 29.0±10.1 | 47.4±10.4 | 35.9±7.5  | 18.3±9.5             | 14.7±5.7             | 45.1±10.4            | 33.8±8.2  |
| Glucose uptake fetal (μmol/L/min) <sup>c</sup>           |           |           | 20.5       |           | 25.0±0.8  | 5.4       | 7.7±0.8              | 4.1±0.4              | 7.8±9.7              | 3.0±1.9   |
| Lactate release maternal (μmol/L/min) <sup>c</sup>       | 88.2      |           | 102.7±24.5 | 57.4±9.2  | 102.5     | 59.0      | 47.9±11.8            | 24.6±25.3            | 92.2±16.0            | 74.2±14.4 |
| Lactate release fetal (μmol/L/min) <sup>c</sup>          |           |           | 28.2±7.3   | 22.6      | 48.7      |           | 16.9±3.7             | 16.0±7.6             | 19.8±5.7             | -0.1±15.1 |

| Experiment                                               | P111113   | P181113   | P030414 <sup>a</sup> | P070414 <sup>a</sup> | P240314 <sup>a</sup> | P270314 <sup>a</sup> | P310314 <sup>a</sup> | P220514 <sup>a</sup> | P260514 <sup>a</sup> | P170714 <sup>a</sup> |
|----------------------------------------------------------|-----------|-----------|----------------------|----------------------|----------------------|----------------------|----------------------|----------------------|----------------------|----------------------|
| Maternal age (years)                                     | 31        | 31        | 34                   | 36                   | 35                   | 36                   | 35                   |                      | 40                   | 38                   |
| Primipara                                                | No        | No        | No                   | No                   | No                   | No                   | No                   |                      | Yes                  | No                   |
| Newborn gender                                           | F         | F         | F                    | M                    | F                    | M                    | M                    |                      | F                    | M                    |
| Gestational age (weeks+days)                             | 38+0      | 38+0      | 39+0                 | 38+4                 | 38+5                 | 39+0                 | 38+2                 |                      | 40+6                 | 38+4                 |
| Newborn weight (g)                                       | 3068      | 3774      | 3274                 | 3634                 | 2826                 | 3800                 | 3752                 |                      | 3970                 | 3980                 |
| Placenta weight (g)                                      | 608       | 658       | 714                  | 968                  | 535                  | 735                  | 692                  |                      | 643                  | 925                  |
| Perfused cotyledon weight (g)                            |           |           | 17.4                 | 16.4                 | 16.2                 | 7.9                  | 12.4                 | 28.0                 | 24.2                 |                      |
| Time from delivery to cannulation of fetal vessels (min) | 28        | 24        | 31                   | 32                   | 32                   | 29                   | 28                   |                      | 29                   | 25                   |
| Volume change fetal circulation (ml/h)                   | -1.0      | -0.8      | -9.7                 | -1.0                 | -9.0                 | -0.4                 | -4.9                 | 0.7                  | -3.1                 | 0.1                  |
| Volume change maternal circulation (ml/h)                | -2.3      | -3.3      | -3.8                 | 0.4                  | -0.6                 | -19                  | -0.9                 | -2,0                 | 1.5                  | -2.6                 |
| Flow rate fetal circulation (ml/minute)                  | 3.1       | 3.1       | 3.1                  | 3.0                  | 3.1                  | 3.1                  | 3.2                  | 3.5                  | 3.3                  | 3.1                  |
| pH maternal <sup>b</sup>                                 | 7.37±0.06 | 7.32±0.07 | 7.44±0.06            | 7.38±0.04            | 7.45±0.05            | 7.42±0.05            | 7.36±0.04            | 7.43±0.07            | 7.42±0.07            | 7.35±0.09            |
| pH fetal <sup>b</sup>                                    | 7.42±0.03 | 7.46±0.02 | 7.33±0.04            | 7.32±0.05            | 7.45±0.03            | 7.47±0.01            | 7.41±0.02            | 7.40±0.06            | 7.44±0.01            | 7.38±0.01            |
| pO <sub>2</sub> maternal (kPa) <sup>b</sup>              | 15.0±3.3  | 15.0±0.8  | 21.0±0.6             |                      |                      |                      |                      | 18.8±1.6             | 18.7±1.5             | 17.2±2.6             |
| pO <sub>2</sub> fetal inflow (kPa) <sup>b</sup>          | 8.0±5.1   | 8.0±4.2   | 6.4±0.9              | 9.6±2.6              |                      |                      |                      | 6.5±2.6              | 6.3±2.3              | 5.5±2.1              |
| pO <sub>2</sub> fetal outflow (kPa) <sup>b</sup>         | 11.5±1.0  | 9.4±1.7   | 7.5±1.7              |                      |                      |                      | 17.9±0.4             | 7.2±4.0              | 6.2±1.6              | 7.6±3.1              |
| Glucose uptake maternal (μmol/L/min) <sup>c</sup>        |           |           | 11.4±5.2             | 31.7±4.5             | 19.9±3.3             | 32.1±10.6            | 29.2±12.1            | 50.4±11.1            | 45.4±11.5            | 48.0±11.5            |
| Glucose uptake fetal (μmol/L/min) <sup>c</sup>           |           |           | 5.5±5.1              | 16.4±10.3            | 3.9±12.1             | 1.4±5.5              | 3.4±2.6              | 12.4±9.9             | 10.0±7.1             | 6.8±2.6              |
| Lactate release maternal (μmol/L/min) <sup>c</sup>       |           |           | 33.3±6.7             | 70.6±11.5            | 38.4±5.2             | 69.3±12.6            | 54.9±24.8            | 105.2±14.6           | 94.2±20.4            | 99.1±16.8            |
| Lactate release fetal (μmol/L/min) <sup>c</sup>          |           |           | 13.7±2.5             | 9.4±5.1              | 1.0±11.1             | 6.9±2.3              | 7.7±6.7              | 28.5±13.4            | 6.7±12.1             | 10.5±3.2             |

<sup>a</sup>Experiments performed with an oxygenator equilibrating the medium with atmospheric air inserted in the maternal circulation

<sup>b</sup>Mean ± standard deviation

<sup>c</sup>Mean ± standard deviation of stabilisation and experimental phases (if data was available from one phase only, uptake/release between first and last measurements is shown)
